# Supplementary material for: Comprehensive Identification and Functional Analysis of Stress-Associated Protein (SAP) Genes in Osmotic Stress in Maize
Source: MDPI journal article supplement (doi:10.3390/ijms232214010), 2022-11-13
Supplement: s1 [file s1]

**Figure S1.** Multiple alignments of amino acid sequences of ZmSAPs

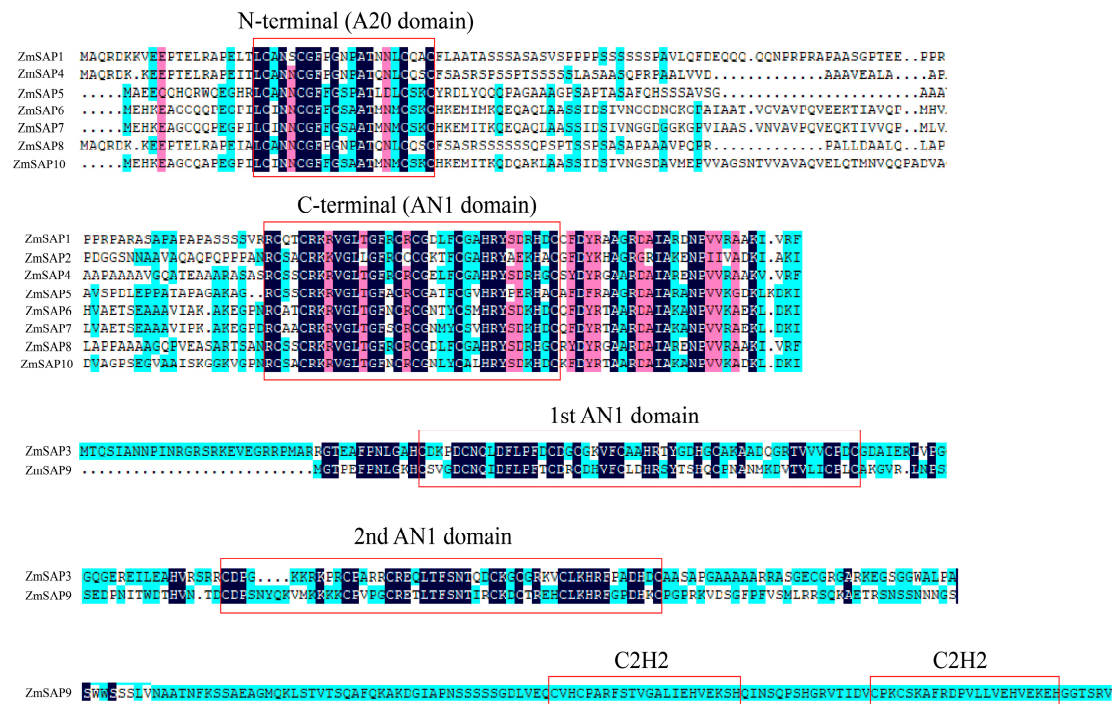

**Figure S2.** Phylogenetic evolutionary tree of ZmSAPs.

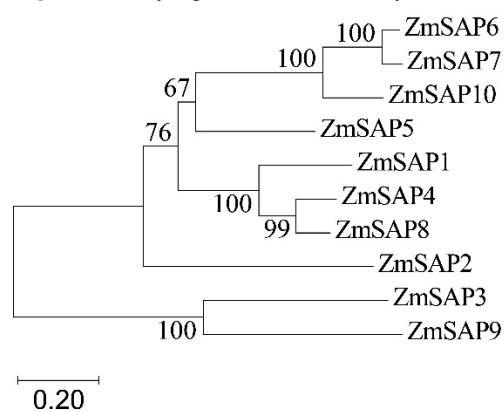

**Figure S3.** Expression profiles of *ZmSAPs* in different development stages of maize.

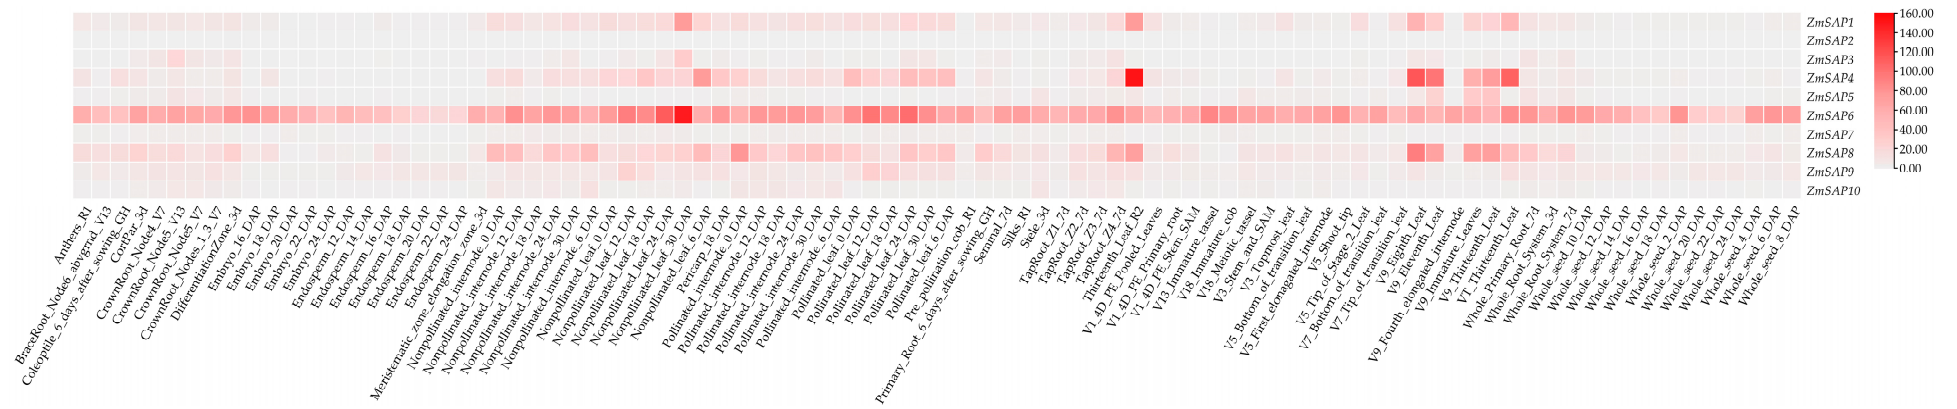

**Figure S4.** Phenotype of yeast under drought stress mimicking by mannitol.

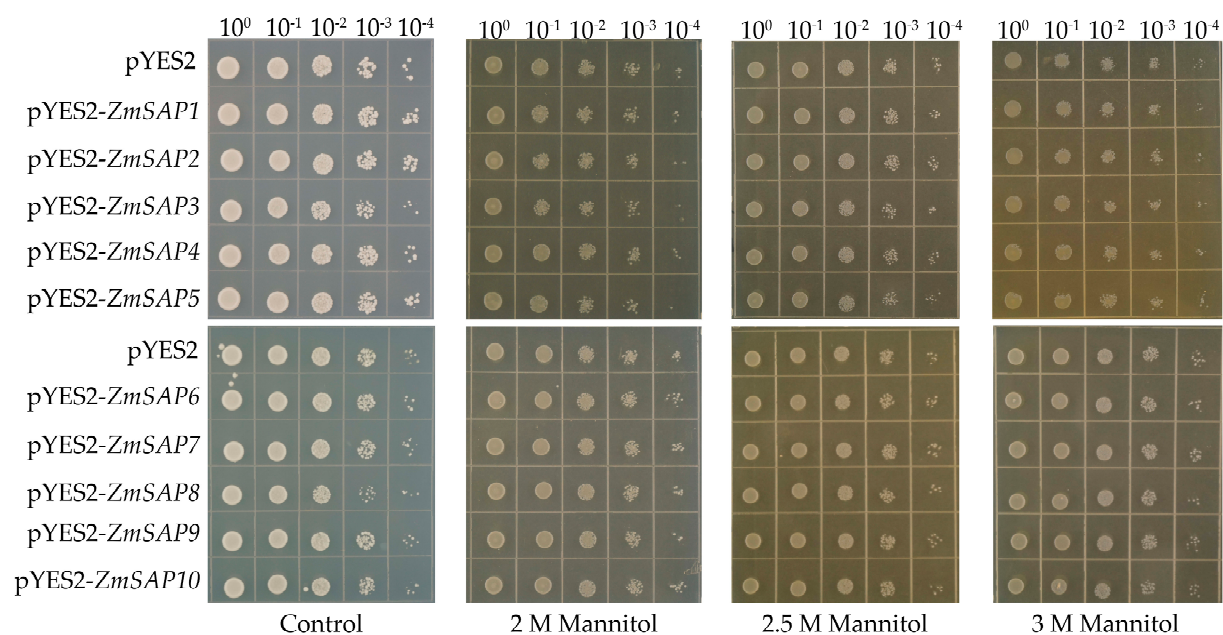

**Table S1.** Collinearity relationship between SAP genes in maize and rice

| Name of <i>ZmSAP</i> | Name of <i>OsSAP</i> |
|----------------------|----------------------|
| <i>ZmSAP1</i>        | <i>OsSAP1</i>        |
| <i>ZmSAP 1</i>       | <i>OsSAP5</i>        |
| <i>ZmSAP 2</i>       | <i>OsSAP14</i>       |
| <i>ZmSAP 3</i>       | <i>OsSAP17</i>       |
| <i>ZmSAP 4</i>       | <i>OsSAP1</i>        |
| <i>ZmSAP 4</i>       | <i>OsSAP5</i>        |
| <i>ZmSAP 5</i>       | <i>OsSAP8</i>        |
| <i>ZmSAP 6</i>       | <i>OsSAP8</i>        |
| <i>ZmSAP 6</i>       | <i>OsSAP4</i>        |
| <i>ZmSAP 7</i>       | <i>OsSAP8</i>        |
| <i>ZmSAP 7</i>       | <i>OsSAP4</i>        |
| <i>ZmSAP 9</i>       | <i>OsSAP16</i>       |
| <i>ZmSAP 10</i>      | <i>OsSAP8</i>        |
| <i>ZmSAP 10</i>      | <i>OsSAP4</i>        |

**Table S2.** Primers used in this study.

| Gene            | Primer sequence (5-3)                                                                       | Assay                                  |
|-----------------|---------------------------------------------------------------------------------------------|----------------------------------------|
| <i>ZmSAP1</i>   | ACGACTGCTGCTTCGACTAC<br>ATCCGAGACGCCTAGAACCT                                                | for RT-qPCR                            |
|                 | CTTGGTACCGAGCTCGGATCCATGGCTCAGCGCGACAAG<br>CCCTCTAGATGCATGCTCGAGGAACCTAACGATCTTGGCGGC       | for pYES2- <i>ZmSAP1</i> construction  |
| <i>ZmSAP 2</i>  | CTGTTTTCGAGACAACGCCG<br>TTATTGCTGCCTCCGTCAGG                                                | for RT-qPCR                            |
|                 | CTTGGTACCGAGCTCGGATCCATGACGCAGAAGCGGAAGAG<br>CCCTCTAGATGCATGCTCGAGAATTTTGGCGATCTTGTCGG      | for pYES2- <i>ZmSAP2</i> construction  |
| <i>ZmSAP 3</i>  | GAAAAGAGGTAGAGGGGCGG<br>AAGTCGAGCTGGTTGCAGTC                                                | for RT-qPCR                            |
|                 | CTTGGTACCGAGCTCGGATCCATGACCCAATCAATCGCTAACAA<br>CCCTCTAGATGCATGCTCGAGGAAGATCTTGAGGCTCCGGATG | for pYES2- <i>ZmSAP3</i> construction  |
| <i>ZmSAP 4</i>  | CGGACAAGGTCTTCGGTGTT<br>CCACTGCACCACCACCATTA                                                | for RT-qPCR                            |
|                 | CTTGGTACCGAGCTCGGATCCATGGCGCAGCGCGACAAG<br>CCCTCTAGATGCATGCTCGAGGAACCTAACGACCTTGGCCG        | for pYES2- <i>ZmSAP4</i> construction  |
| <i>ZmSAP 5</i>  | ACGGATCGTCGGATTGTACG<br>TCAGTAAACGGCCAGCGATT                                                | for RT-qPCR                            |
|                 | CTTGGTACCGAGCTCGGATCCATGGCGGAGGAGCAGCAG<br>CCCTCTAGATGCATGCTCGAGGATCTTGTCCTTGAGCTTATCGC     | for pYES2- <i>ZmSAP5</i> construction  |
| <i>ZmSAP 6</i>  | CCCCAGTCGAGTCACGAAAA<br>ACGATACCGACCCAAACCAC                                                | RT-qPCR                                |
|                 | CTTGGTACCGAGCTCGGATCCATGGAACACAAGGAGGCCG<br>CCCTCTAGATGCATGCTCGAGGATCTTGTCAGCTTCTCCGC       | for pYES2- <i>ZmSAP6</i> construction  |
| <i>ZmSAP 7</i>  | GTGTTTTAGGCCACTGCTC<br>GCAGAGGTTGCTTCCTCCTA                                                 | for RT-qPCR                            |
|                 | CTTGGTACCGAGCTCGGATCCATGGAACACAAGGAGGCCG<br>CCCTCTAGATGCATGCTCGAGGATCTTGTCGAGCTTCTCCGC      | for pYES2- <i>ZmSAP7</i> construction  |
| <i>ZmSAP 8</i>  | TAGGTTCGATTCGACCGGC<br>GATTTCGCATGCCTTTCCCC                                                 | for RT-qPCR                            |
|                 | CTTGGTACCGAGCTCGGATCCATGGCGCAGCGCGACAAG<br>CCCTCTAGATGCATGCTCGAGGAACCTAACGATCTTGGCCGC       | for pYES2- <i>ZmSAP8</i> construction  |
| <i>ZmSAP 9</i>  | TCACGGTCTCACTCTCACCT<br>AAACGGACGGGACACGAAAT                                                | for RT-qPCR                            |
|                 | CTTGGTACCGAGCTCGGATCCATGGGCACGCCGAGTTC<br>CCCTCTAGATGCATGCTCGAGCACTCTTGACGTTCTCCATGC        | for pYES2- <i>ZmSAP9</i> construction  |
| <i>ZmSAP 10</i> | CTTTATCTCTCTCCACGCC<br>CGATTCCTCTCCGACGATCC                                                 | for RT-qPCR                            |
|                 | CTTGGTACCGAGCTCGGATCCATGGAGCACAAGGAGGCTGG<br>CCCTCTAGATGCATGCTCGAGGATCTTGTCGAGCTTGCTGCGC    | for pYES2- <i>ZmSAP10</i> construction |
